# Supplementary material
Source: publisher site journal article supplement (http://www.degruyter.com/publication/journal_key/IJCRE/downloadAsset/IJCRE_Call_for_Papers%20_Special_Issue_on_Metallurgical_Reaction_Engineering_2022.pdf)
Supplement: Supplementary file 1 [file IJCRE_Call_for_Papers%20_Special_Issue_on_Metallurgical_Reaction_Engineering_2022.pdf]

## Call for Papers for the Special Issue on “Metallurgical Reaction Engineering”

Metallurgical Reaction Engineering, originated from chemical reaction engineering, focuses on the transfer of momentum, heat, and mass inside a metallurgical reactor and metallurgical macroscopic reaction kinetics. By means of physical and mathematical simulation, the core of Metallurgical Reaction Engineering is to study the operation process of metallurgical reactors and systems to achieve stable operation, optimized design and scale-up. Metallurgical Reaction Engineering will play a key role in the development of new metallurgical technologies, new reactors and new production processes.

To present state-of-the-art studies on new advances in metallurgical multiphase transport and reaction engineering, International Journal of Chemical Reactor Engineering plans to organize a special issue on " Metallurgical Reaction Engineering" in 2022 (regular issue).

Dr. Heng Zhou ([zhouheng@ustb.edu.cn](mailto:zhouheng@ustb.edu.cn)), Dr. Mingyin Kou ([koumingyin@ustb.edu.cn](mailto:koumingyin@ustb.edu.cn)) and Prof. Shengli Wu ([wushengli@ustb.edu.cn](mailto:wushengli@ustb.edu.cn)) from University of Science and Technology Beijing , and Prof. Zongshu Zou ([zouzs@mail.neu.edu.cn](mailto:zouzs@mail.neu.edu.cn)) from Northeastern University are invited to serve as guest editors for this special issue. It is our pleasure to invite you to submit original contributions to this special issue. Articles include but not limited to the following topics are welcome.

1. Review works about Metallurgical Reaction Engineering
2. Measurement and calculation of transport kinetic parameters of metallurgical system
3. Metallurgical multiphase transport phenomenon
4. Optimization and control of metallurgical process
5. Mathematical and physical simulation and engineering scale-up
